# Supplementary material for: Boosting the photocatalytic activity of graphite carbon nitride by designing novel MoS2–transition metal heterojunction cocatalysts
Source: Royal Society of Chemistry journal article supplement (doi:10.1039/c9tc03951a), 2019-01-01
Supplement: c9tc03951a1.pdf [file c9tc03951a1.pdf]

## **Supporting Information**

**Boosting the photocatalytic activity of graphite carbon nitride by design of novel  
MoS<sub>2</sub>-transition metals heterojunctions cocatalyst**

**Kui Li,\* Ye-Zhan Lin, Yu Zhang, Mei-Ling Xu, Ling-Wang Liu and Fu-Tian Liu**

School of Materials Science and Engineering, University of Jinan, Jinan 250022,  
China

Email: mse\_lik@ujn.edu.cn.

## Characterization Methods

The powder X-ray diffraction (XRD) patterns were recorded on a D/max 2500 VL/PC diffractometer (Japan) equipped with graphite monochromatized Cu K $\alpha$  radiation ( $\lambda = 1.54060 \text{ \AA}$ ), and the corresponding work voltage and current was 40 kV and 100 mA, respectively. The transmission electron microscopy (TEM) and high-resolution TEM (HRTEM) images were recorded on JEOL-2100F apparatus at an accelerating voltage of 200 kV. Surface morphologies of the g-C<sub>3</sub>N<sub>4</sub>-based heterostructures were examined by a scanning electron microscope (SEM, JSM-7600F) at an acceleration voltage of 10 kV, and the elemental mapping was performed with JSM-5160LV-Vantage typed energy dispersive X-ray spectroscopy (EDS) spectrometer. Element content analysis was tested on an inductively coupled plasma (ICP) spectroscope (Agilent ICP0ES730, America). The UV–Vis absorption and diffused reflectance spectra were recorded using a Cary 5000 UV-Vis spectrometer (Viarian, USA) with BaSO<sub>4</sub> as a reflectance standard. Steady photoluminescence (PL) emission spectra were tested by a luminescence spectrophotometer (QM-400, PTI) with 350 nm excitation wavelength.

## **Electrochemical measurements**

All the electrochemical experiments were conducted on the electrochemical station (Bio-Logic SP-150) in a three-electrode system at room temperature with a glassy carbon electrode (3 mm in diameter), (sheet resistance 20–25  $\Omega$ /square) as the working electrode, a platinum wire as the auxiliary electrode, and an Ag/AgCl electrode as the reference electrode. For the electrochemical measurements, 4 mg of the catalysts were dispersed in 2 mL of 9:1 v/v water/Nafion by sonication to form a homogeneous ink. Typically, 5  $\mu$ L well-dispersed catalysts were covered on the glassy carbon electrode and then dried in an ambient environment for measurements. The electrocatalyst was prepared with a catalyst loading of 0.14 mg  $\text{cm}^{-2}$ . The electrolyte of transient photocurrent responses experiments, electrochemical impedance spectroscopy (EIS), and Mott-Schottky (M-S) was 0.5 M  $\text{Na}_2\text{SO}_4$  aqueous solution, and the electrolyte of linear sweep voltammetry (LSV) was in 1M KOH solutions for the HER and OER results. EIS was performed at an impressed voltage of -0.3 eV, for voltage ranging from -2.5 V to 2.5 V. M-S was measured for a scan voltage ranging from -1 V to 0.5 V at 500-2000 Hz. The transient photocurrent responses measurement was performed under full light irradiation, and the LSV obtained at a scan rate of 1 mV/s.

## Photocatalytic hydrogen evolution

The photocatalytic H<sub>2</sub>-production experiments were performed via a photocatalytic H<sub>2</sub>-production activity evaluation system (CEL-SPH2N, CEAULight, China) in a 300 mL Pyrex flask, and the openings of the flask were sealed with silicone rubber septum. A 300 W xenon arc lamp, which was positioned 13 cm away from the reaction solution, was used as an all light source to trigger the photocatalytic reaction. A 300 W xenon arc lamp with and without a UV-cutoff filter with a wavelength range of 420 ~ 800 nm, which was positioned 13 cm away from the reaction solution, was used as a visible light source to trigger the photocatalytic reaction. The focused intensity on the flask was ~ 200 mW·cm<sup>-2</sup>, which was measured by a FZ-A visible-light radiometer (made in the photoelectric instrument factory of Beijing Normal University, China). In a typical photocatalytic H<sub>2</sub>-production experiment, 50 mg of the as-prepared photocatalyst was suspended in 50 mL of mixed aqueous solution containing 5 ml C<sub>6</sub>H<sub>15</sub>NO<sub>3</sub> (TEOA, AR,98%). Before irradiation, the system was vacuumed for 5 min via the vacuum pump to completely remove the dissolved oxygen and ensure the reactor was in an anaerobic condition. A continuous magnetic stirrer was applied at the bottom of the reactor to keep the photocatalyst particles in suspension during the experiments. H<sub>2</sub> content was analyzed by gas chromatography (GC-7900, CEAULight, China). All glasswares were carefully rinsed with DI water prior to usage. The photocatalytic stability was performed in the same processing parameters.

## Supporting Figures

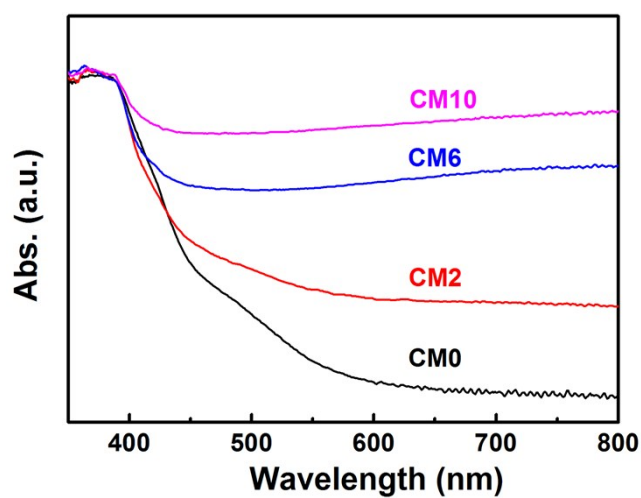

**Fig. S1.** Effect of amount of MoS<sub>2</sub> on the UV-visible diffuse reflection spectra in g-C<sub>3</sub>N<sub>4</sub>-MoS<sub>2</sub> heterostructures.

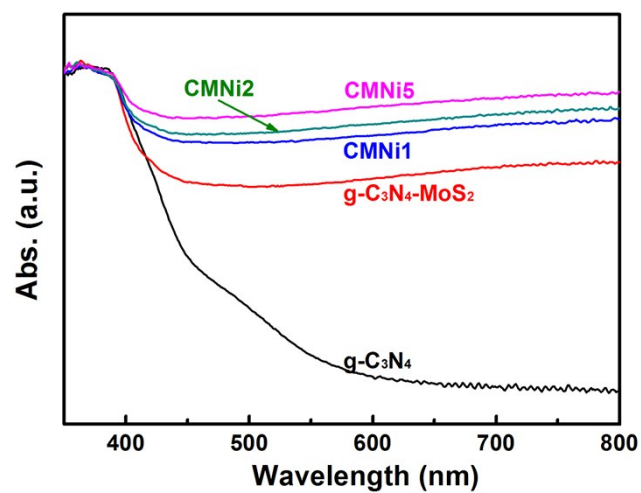

**Fig. S2.** Effect of amount of Ni on the UV-visible diffuse reflection spectra in g-C<sub>3</sub>N<sub>4</sub>-MoS<sub>2</sub>-Ni ternary heterostructures.

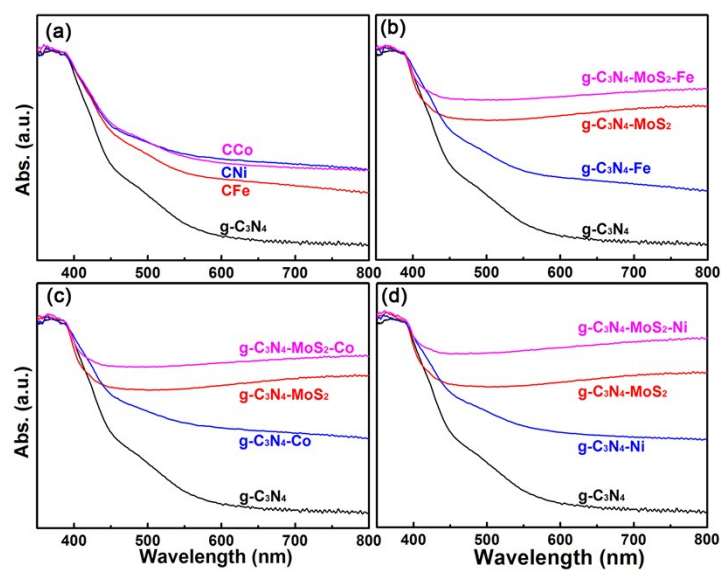

**Fig. S3.** (a) Effect of types of metal on the UV–visible diffuse reflection spectra in g-C<sub>3</sub>N<sub>4</sub>-metal heterostructures. The comparison results of the UV–visible diffuse reflection spectra of g-C<sub>3</sub>N<sub>4</sub>, g-C<sub>3</sub>N<sub>4</sub>-metals, g-C<sub>3</sub>N<sub>4</sub>-MoS<sub>2</sub>, and g-C<sub>3</sub>N<sub>4</sub>-MoS<sub>2</sub>-metals, with metals of (b) Ni, (c) Co and (d) Fe.

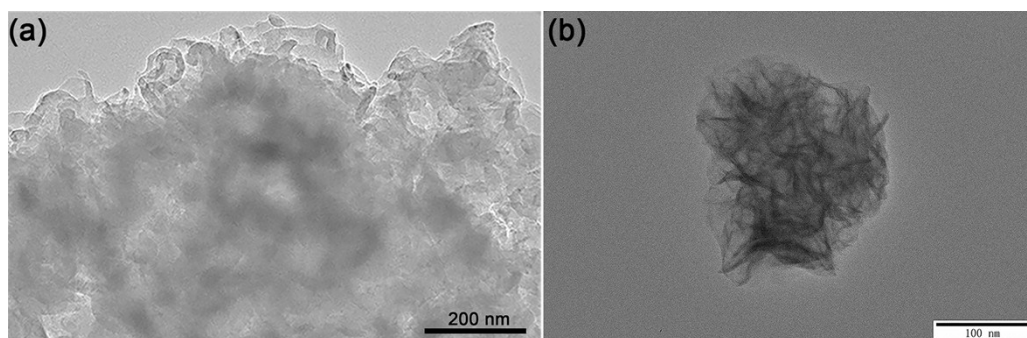

**Fig. S4.** Transmission electron microscopy (TEM) images of the (a) pristine g-C<sub>3</sub>N<sub>4</sub> and (b) MoS<sub>2</sub> derived from PMo<sub>12</sub>.

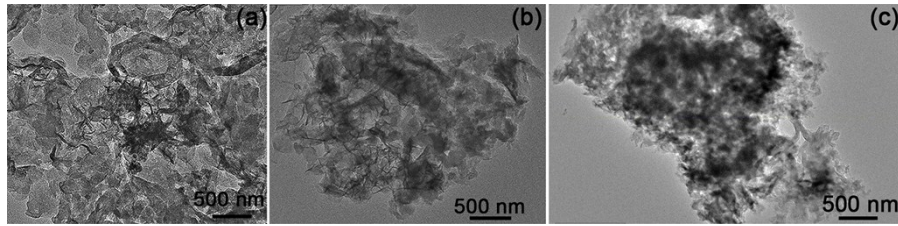

**Fig. S5.** The TEM images of (a)  $g\text{-C}_3\text{N}_4\text{-MoS}_2\text{-Fe}$ , (b)  $g\text{-C}_3\text{N}_4\text{-MoS}_2\text{-Co}$  and (c)  $g\text{-C}_3\text{N}_4\text{-MoS}_2\text{-Ni}$ .

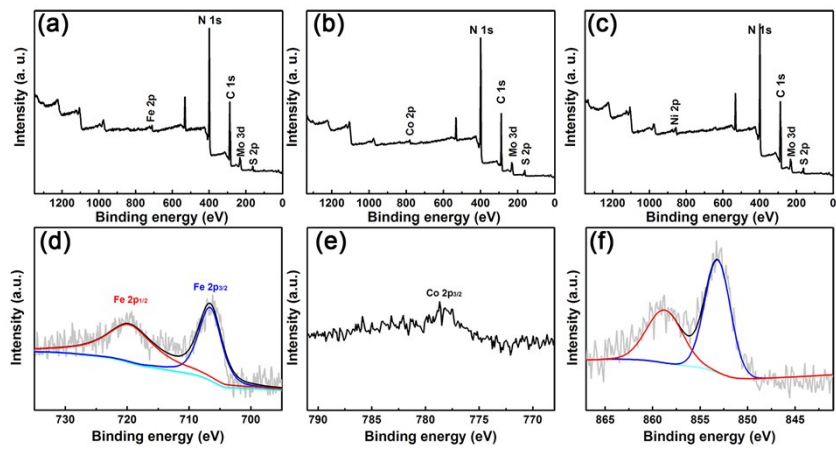

**Fig. S6.** The survey XPS spectrum of (a)  $g\text{-C}_3\text{N}_4\text{-MoS}_2\text{-Fe}$ , (b)  $g\text{-C}_3\text{N}_4\text{-MoS}_2\text{-Co}$  and (c)  $g\text{-C}_3\text{N}_4\text{-MoS}_2\text{-Ni}$  ternary heterostructures, and high-resolution XPS spectra of (d) Fe 2p, (e) Co 2p and (f) Ni 2p in  $g\text{-C}_3\text{N}_4\text{-MoS}_2\text{-Fe}$ ,  $g\text{-C}_3\text{N}_4\text{-MoS}_2\text{-Co}$  and  $g\text{-C}_3\text{N}_4\text{-MoS}_2\text{-Ni}$ , respectively.

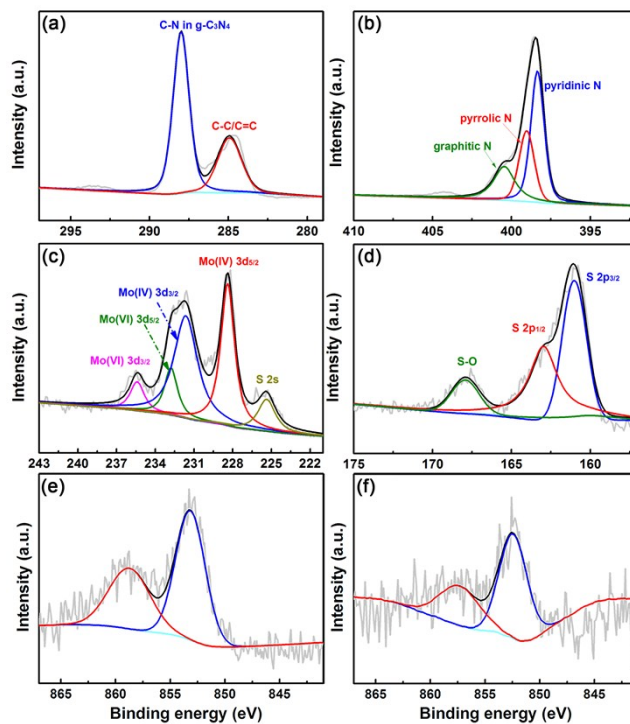

**Fig. S7.** The high-resolution XPS spectra of (a) C 1s, (b) N 1s, (c) Mo 3d and (d) S 2p in g-C<sub>3</sub>N<sub>4</sub>-MoS<sub>2</sub>-Ni after the photocatalytic stability test, and Ni 2p in g-C<sub>3</sub>N<sub>4</sub>-MoS<sub>2</sub>-Ni (e) before and (f) after the photocatalytic stability measurement. In comparison with the corresponding elemental spectrum in pristine g-C<sub>3</sub>N<sub>4</sub>-MoS<sub>2</sub>-Ni in Fig. 4c, the binding energy of the deconvoluted peaks didn't change, verifying its good photocatalytic stability.



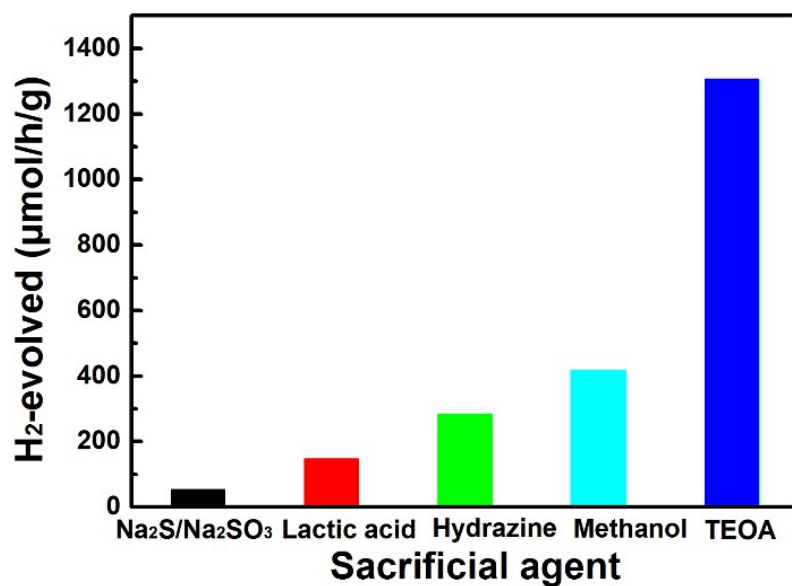

**Fig. S8.** Effect of the types of sacrificial agents (Na<sub>2</sub>S (0.35 M)/Na<sub>2</sub>SO<sub>3</sub> (0.25 M) mixed solution, lactic acid (10 vol%), hydrazine (10 vol%), methanol (10 vol%) and TEOA (10 vol%)) on the photocatalytic hydrogen production activity of g-C<sub>3</sub>N<sub>4</sub>-MoS<sub>2</sub>-Ni under visible light irradiation.

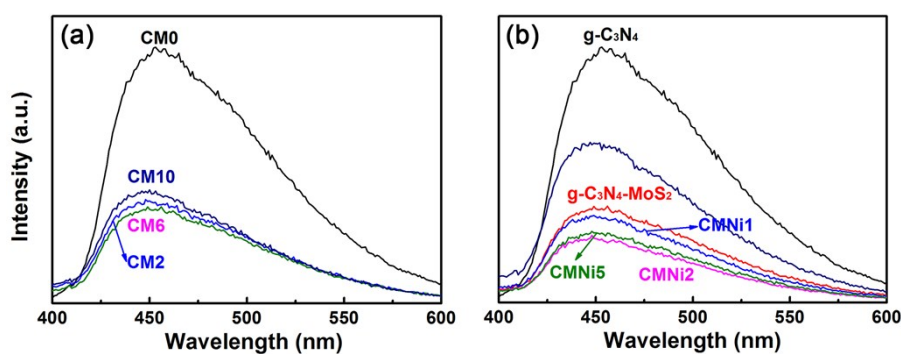

**Fig. S9.** The PL spectra of the g-C<sub>3</sub>N<sub>4</sub>-based samples with different amounts of (a) MoS<sub>2</sub>, and (b) Ni.

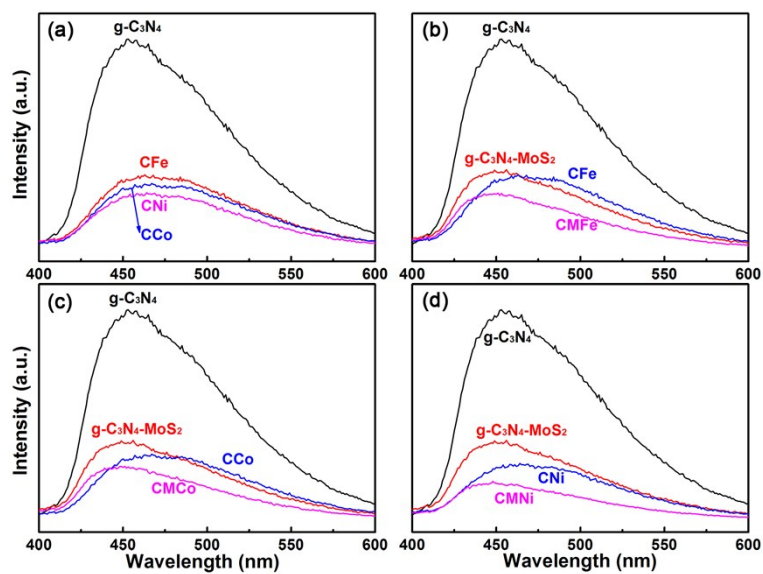

**Fig. S10.** (a) Effect of types of metal on the PL spectra in  $g\text{-C}_3\text{N}_4\text{-metal}$  heterostructures. The comparison results of the PL spectra of  $g\text{-C}_3\text{N}_4$ ,  $g\text{-C}_3\text{N}_4\text{-metals}$ ,  $g\text{-C}_3\text{N}_4\text{-MoS}_2$ , and  $g\text{-C}_3\text{N}_4\text{-MoS}_2\text{-metals}$ , with metals of (b) Fe, (c) Co and (d) Ni.

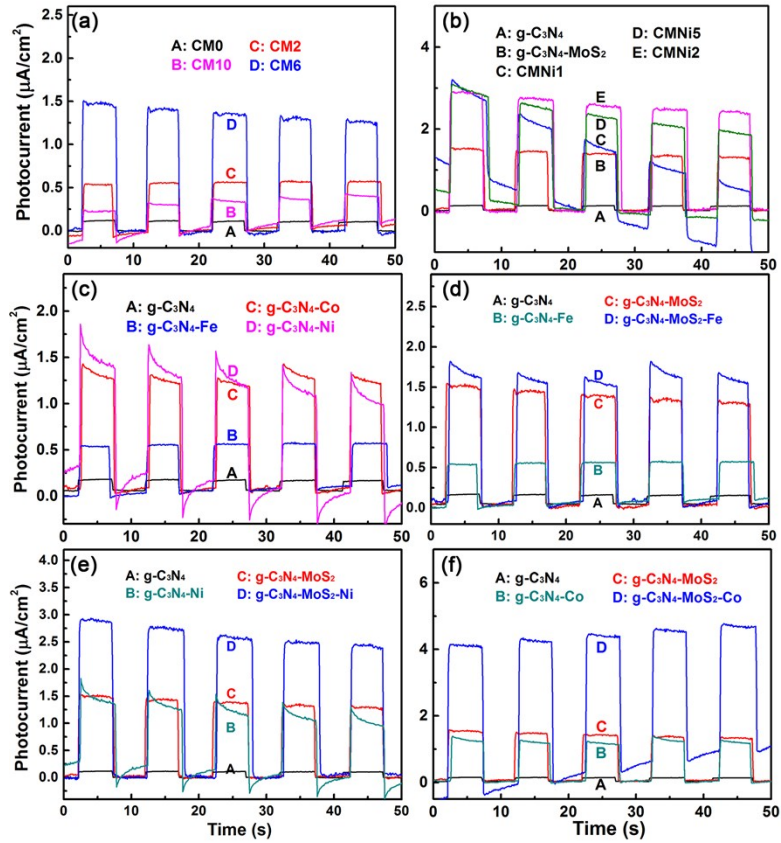

**Fig. S11.** Effect of amount of (a) MoS<sub>2</sub> and (b) Ni on the transient photocurrent responses in g-C<sub>3</sub>N<sub>4</sub>-based heterostructures. (c) Effect of types of metal on the transient photocurrent responses in g-C<sub>3</sub>N<sub>4</sub>-metal heterostructures. The comparison results of the transient photocurrent responses of g-C<sub>3</sub>N<sub>4</sub>, g-C<sub>3</sub>N<sub>4</sub>-metals, g-C<sub>3</sub>N<sub>4</sub>-MoS<sub>2</sub>, and g-C<sub>3</sub>N<sub>4</sub>-MoS<sub>2</sub>-metals, with metals of (d) Fe, (e) Ni and (f) Co.

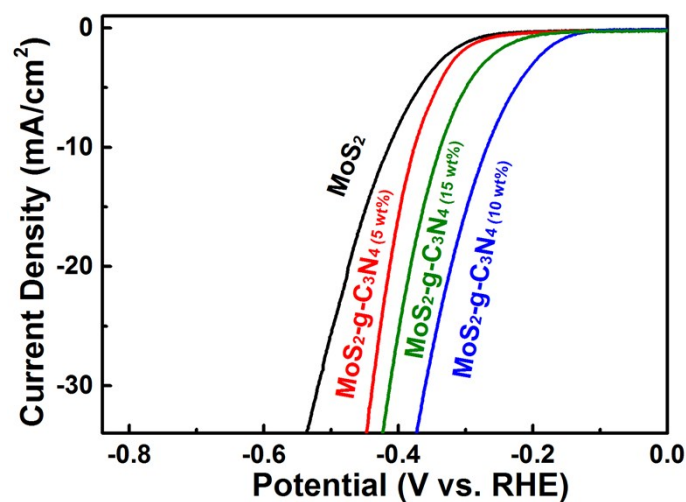

**Fig. S12.** Effect of amount of g-C<sub>3</sub>N<sub>4</sub> on the electrocatalytic HER performance of MoS<sub>2</sub>-g-C<sub>3</sub>N<sub>4</sub> heterostructures. Adoption of small amount of g-C<sub>3</sub>N<sub>4</sub> could dramatically improve the electrocatalytic HER performance of MoS<sub>2</sub>, which was consistent with that the modified g-C<sub>3</sub>N<sub>4</sub> could also exhibit the excellent electrocatalytic activity reported in previous publication (*J. Am. Chem. Soc.* 2017, **139**, 3336–3339 and *Adv. Funct. Mater.* **2017**, 1606352), and the MoS<sub>2</sub>-g-C<sub>3</sub>N<sub>4</sub> with 10 wt% g-C<sub>3</sub>N<sub>4</sub> (weight ratio of MoS<sub>2</sub>/g-C<sub>3</sub>N<sub>4</sub> was nearly 10) exhibited the optimal electrocatalytic HER activity.

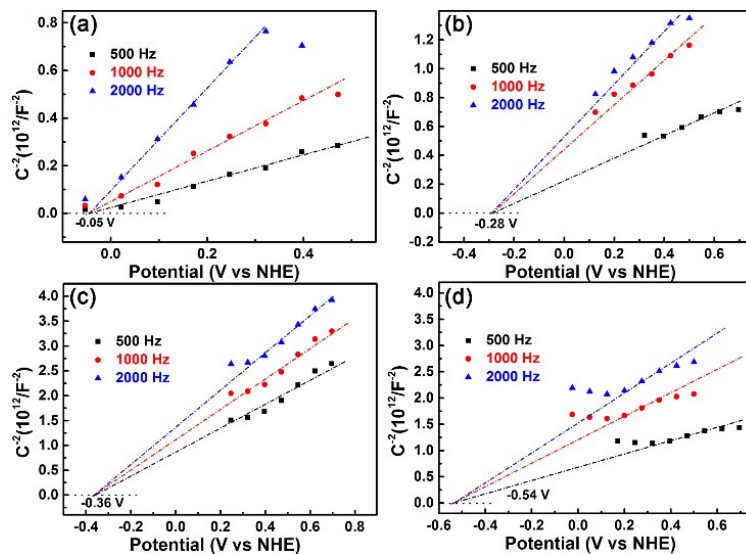

**Fig. S13.** The Mott–Schottky plots of (a) MoS<sub>2</sub>, (b) MoS<sub>2</sub>-Fe, (c) MoS<sub>2</sub>-Co and (d) MoS<sub>2</sub>-Ni.

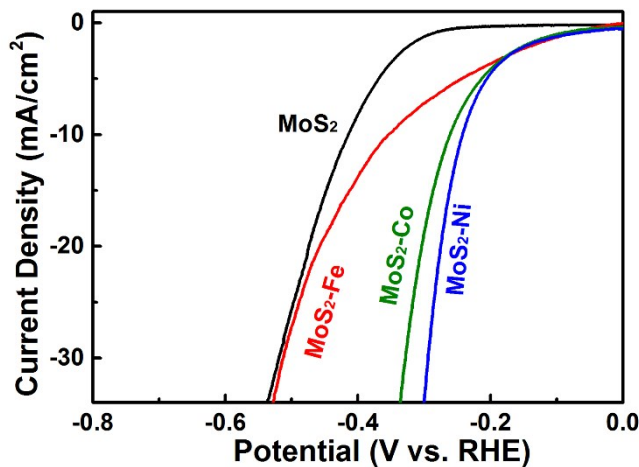

**Fig. S14.** Effect of types of metals on the electrocatalytic HER performance of MoS<sub>2</sub>. The adoption of Ni could dramatically raise the electrocatalytic HER performance as confirmed by the lower HER overpotential and larger current density. This result indicated the MoS<sub>2</sub>-metal heterojunction could acted as more effective cocatalyst for improving the photocatalytic activity of g-C<sub>3</sub>N<sub>4</sub> as verified by its better HER performance.
